# Supplementary material for: Highly diastereoselective cyclopropanation of α-methylstyrene catalysed by a C2-symmetrical chiral iron porphyrin complex
Source: Royal Society of Chemistry journal article supplement (doi:10.1039/c3cc48605b), 2013-12-12
Supplement: c3cc48605b.pdf [file c3cc48605b.pdf]

## Highly diastereoselective cyclopropanation of $\alpha$ -methylstyrene catalyzed by a $C_2$ -symmetrical chiral iron porphyrin complex

Daniela Intrieri, Stéphane Le Gac, Alessandro Caselli, Eric Rose, Bernard Boitrel, Emma Gallo

### Supporting Information

#### Page Contents

|            |         |                                                     |
|------------|---------|-----------------------------------------------------|
| <b>S1</b>  | • • • • | <b>General methods for synthesis and catalysis.</b> |
| <b>S2</b>  | • • • • | <b>Synthesis of compound 2.</b>                     |
| <b>S3</b>  | • • • • | <b>Synthesis of complex 2Fe.</b>                    |
| <b>S3</b>  | • • • • | <b>Catalytic procedures.</b>                        |
| <b>S3</b>  | • • • • | <b>Recycle of the catalyst 2Fe.</b>                 |
| <b>S4</b>  | • • • • | <b>UV-Vis spectra.</b>                              |
| <b>S4</b>  | • • • • | <b>IR spectra.</b>                                  |
| <b>S5</b>  | • • • • | <b>NMR spectra.</b>                                 |
| <b>S8</b>  | • • • • | <b>MS-ESI spectra.</b>                              |
| <b>S10</b> | • • • • | <b>NMR and HPLC spectra of catalytic reactions.</b> |
| <b>S24</b> | • • • • | <b>References.</b>                                  |

#### General methods for synthesis and catalysis

Unless otherwise specified, all reactions were carried out under nitrogen atmosphere employing standard Schlenk techniques and magnetic stirring. THF and benzene were dried by M. Braun SPS-800 solvent purification system. Toluene and  $\alpha$ -methylstyrene were distilled over sodium and kept under nitrogen. All the other starting materials were commercial products used as received. (R)-2,2'-dimethoxy-1,1'-binaphthyl-3,3'-diboronic acid<sup>1</sup>, and porphyrin **1**<sup>2</sup> were synthesized by methods reported in the literature or by using minor modifications of them. The purity of  $\alpha$ -methylstyrene was checked by GC-MS or <sup>1</sup>H NMR analysis. NMR spectra were recorded at room temperature on a Bruker AC-300, on a Bruker avance 300-DRX, operating at 300 MHz for <sup>1</sup>H, at 75 MHz for <sup>13</sup>C or on a Bruker Avance 400-DRX spectrometers, operating at 400 MHz for <sup>1</sup>H and at 100 MHz for <sup>13</sup>C, or on a Bruker avance 500-DRX spectrometer operating at 500 MHz for <sup>1</sup>H and at 125 MHz for <sup>13</sup>C. Chemical shift (ppm) are reported relative to TMS. The <sup>1</sup>H NMR signals of the compounds described in the following have been attributed by 2D NMR techniques. GC-MS analyses were performed on Shimadzu QP5050A instrument. Infrared spectra were recorded on a Varian Scimitar FTS 1000 spectrophotometer. UV/Vis spectra were recorded on an Agilent 8453E instrument.  $[\alpha]_D$  values are given in  $10^{-1} \text{deg cm}^2 \text{g}^{-1}$ . The ESR spectrum of **2Fe** was recorded from a sample powder at 77 K with a Bruker EMX X-band spectrometer equipped with an Oxford cryostat. Elemental analyses and mass spectra were recorded in the analytical laboratories of Milan University.

## Synthesis of compound 2.

In a dried 100 mL Schlenk flask, compound **1**<sup>[2]</sup> (0.300 g,  $2.33 \times 10^{-4}$  mol), (*R*)-2,2'-dimethoxy-1,1'-binaphthyl-3,3'-diboronic acid (0.226 g,  $5.60 \times 10^{-4}$  mol), tetrakis(triphenyl-phosphine)palladium(0) (0.108 g,  $9.34 \times 10^{-5}$  mol) and potassium carbonate (0.516 g,  $3.71 \times 10^{-3}$  mol) were dissolved in 16.0 mL of toluene, 5.0 mL of ethanol and 8.0 mL of water. The biphasic solution was refluxed under nitrogen atmosphere for 4 hours until the complete consumption of **1** that was monitored by TLC. The resulting mixture was allowed to reach room temperature and the biphasic solution was diluted with 50.0 mL of saturated aqueous  $\text{NH}_4\text{Cl}$  and 50.0 mL of  $\text{CH}_2\text{Cl}_2$  and then it was separated. The aqueous phase was extracted with an additional  $2 \times 50$  mL of  $\text{CH}_2\text{Cl}_2$ , and the combined organic phases were washed with  $1 \times 50$  mL of water and  $1 \times 50$  mL of saturated aqueous  $\text{NaHCO}_3$ . The organic phase was dried over  $\text{Na}_2\text{SO}_4$  and filtered. The filtrate was concentrated *in vacuo* and then purified by chromatography ( $\text{SiO}_2$  15-40  $\mu\text{m}$ , eluent dichloromethane/methanol = 99.5:0.5). (**2**, 0.143 g, 35%). Elemental Analysis calcd for  $\text{C}_{120}\text{H}_{86}\text{N}_8\text{O}_8$ : C, 81.52; H, 4.90; N, 6.34; found: C, 81.26; H, 4.97; N, 5.94.  $\nu_{\text{max}}(\text{CH}_2\text{Cl}_2)/\text{cm}^{-1}$ : 3685.7 (w), 3412.8 (w), 1711.0 (w), 1676.8 (w), 1519.1 (w), 1445.1 (w), 1418.5 (w), 1359.6 (w), 1305.9 (w), 1240.9 (w), 1101.2 (w), 1009.5 (w).  $\nu_{\text{max}}(\text{ATR})/\text{cm}^{-1}$  3423.6 (w), 3316.6 (w), 3056.6 (w), 2963.2 (w), 2938.3 (w), 1681.2 (w), 1580.8 (w), 1513.1 (w), 1443.3 (w), 1302.5 (w), 1260.6 (w), 1101.6 (w), 1012.3 (w).  $\lambda_{\text{max}}(\text{CH}_2\text{Cl}_2)/\text{nm}$  423, 517, 551, 590, 646 ( $\log \epsilon_{\text{M}}$  4.82, 3.57, 3.06, 2.96, 2.71).  $[\alpha]_{\text{D}}^{20} = -809.524$  ( $c = 7 \times 10^{-4}$  g/100mL; in  $\text{CH}_2\text{Cl}_2$ ).  $m/z$  (ESI) 1767.1 [ $\text{M}^+$ ].  $^1\text{H}$  NMR (500 MHz,  $\text{CDCl}_3$ , 298 K)  $\delta$  9.07 (d, 2H,  $J = 8$  Hz,  $\text{HAr}_{\text{meso}}$ ), 9.00 (s, 2H,  $\text{H}_{\beta\text{pyr}}$ ), 8.95 (s, 2H,  $\text{H}_{\beta\text{pyr}}$ ), 8.94 (d, 2H,  $J = 4$  Hz,  $\text{H}_{\beta\text{pyr}}$ ), 8.90 (d, 2H,  $J = 8$  Hz,  $\text{HAr}_{\text{meso}}$ ), 8.88 (d, 2H,  $J = 4$  Hz,  $\text{H}_{\beta\text{pyr}}$ ), 7.98 (dd, 2H,  $J_1 = 1$  Hz,  $J_2 = 8$  Hz,  $\text{HAr}_{\text{meso}}$ ), 7.89 (dt, 2H,  $J_1 = 1$  Hz,  $J_2 = 8$  Hz,  $\text{HAr}_{\text{meso}}$ ), 7.86 (dt, 2H,  $J_1 = 1$  Hz,  $J_2 = 8$  Hz,  $\text{HAr}_{\text{meso}}$ ), 7.85 (s, 2H,  $\text{NHCO}$ ), 7.83 (dd, 2H,  $J_1 = 1$  Hz,  $J_2 = 8$  Hz,  $\text{HAr}_{\text{meso}}$ ), 7.70 (d, 4H,  $J = 8$  Hz,  $\text{HAr}_{\text{binap}}$ ), 7.64 (s, 2H,  $\text{HAr}_{\text{binap}}$ ), 7.63 (s, 2H,  $\text{HAr}_{\text{binap}}$ ), 7.62 (s, 2H,  $\text{NHCO}$ ), 7.51 (dt, 2H,  $J_1 = 1$  Hz,  $J_2 = 8$  Hz,  $\text{HAr}_{\text{meso}}$ ), 7.49 (dt, 2H,  $J_1 = 1$  Hz,  $J_2 = 8$  Hz,  $\text{HAr}_{\text{meso}}$ ), 7.32 (s, 2H,  $\text{HAr}_{\text{strap}}$ ), 7.27 (m, 2H,  $\text{HAr}_{\text{binap}}$ ), 7.19 (s, 2H,  $\text{HAr}_{\text{strap}}$ ), 7.07 (m, 2H,  $\text{HAr}_{\text{binap}}$ ), 6.90 (d, 2H,  $J = 8$  Hz,  $\text{HAr}_{\text{binap}}$ ), 6.83 (d, 2H,  $J = 8$  Hz,  $\text{HAr}_{\text{binap}}$ ), 6.67 (d, 2H,  $J = 8$  Hz,  $\text{HAr}_{\text{strap}}$ ), 6.39 (d, 2H,  $J = 8$  Hz,  $\text{HAr}_{\text{strap}}$ ), 6.12 (t, 2H,  $J = 8$  Hz,  $\text{HAr}_{\text{strap}}$ ), 5.98 (t, 2H,  $J = 8$  Hz,  $\text{HAr}_{\text{strap}}$ ), 5.91 (d, 2H,  $J = 8$  Hz,  $\text{HAr}_{\text{strap}}$ ), 5.78 (d, 2H,  $J = 8$  Hz,  $\text{HAr}_{\text{strap}}$ ), 3.87 (d, 2H,  $J = 8$  Hz,  $\text{CH}_2$ ), 3.72 (d, 2H,  $J = 8$  Hz,  $\text{CH}_2$ ), 3.66 (d, 2H,  $J = 8$  Hz,  $\text{CH}_2$ ), 3.55 (d, 2H,  $J = 8$  Hz,  $\text{CH}_2$ ), 2.42 (s, 6H, OMe), 1.89 (s, 6H, OMe), -2.64 (s, 2H,  $\text{NH}_{\text{int}}$ ).  $^{13}\text{C}$  NMR (125 MHz,  $\text{CDCl}_3$ , 298 K)  $\delta$  166.3, 165.6, 154.9(0), 154.8(7), 141.8, 141.5, 138.9, 138.6, 135.4, 135.2, 135.1, 134.2, 133.5, 133.4, 133.0, 132.6, 131.9, 130.9, 130.4(5), 130.4(2), 130.3(9) (2C), 130.3(5) (2C), 130.1, 128.1, 128.0, 127.7, 127.5(3), 127.4(9), 127.4(3), 126.3, 125.7(5), 125.4(4), 125.4(2), 125.1, 124.9, 124.1, 123.1, 122.8, 122.6, 120.6, 115.6, 115.0, 59.9, 59.8, 38.5, 37.9.

### Synthesis of complex **2Fe** (Fe = Fe<sup>III</sup>(OCH<sub>3</sub>))

In a dried 50 mL Schlenk flask, porphyrin **2** (0.078 g, 4.40×10<sup>-5</sup> mol) and FeBr<sub>2</sub> (0.047 g, 2.20×10<sup>-4</sup> mol) were dissolved in 25.0 mL of THF. The dark solution was refluxed under nitrogen atmosphere for 24 hours until the complete consumption of **2** that was monitored by TLC. The mixture was evaporated to dryness and the residue purified by chromatography (alumina 0.063-0.200 mm, eluent CH<sub>2</sub>Cl<sub>2</sub>/CH<sub>3</sub>OH = 99.5:0.5). (**2Fe** 0.081 g, 99 %). Elemental analysis: Found: C, 78.83; H, 4.65; N, 6.15. Calc for C<sub>121</sub>H<sub>87</sub>FeN<sub>8</sub>O<sub>9</sub>: C, 78.43; H, 4.73; N, 6.05).  $\nu_{\max}(\text{CH}_2\text{Cl}_2)/\text{cm}^{-1}$  3685.7 (w), 3418.9 (w), 1723.7 (w), 1676.8 (w), 1605.3 (w), 1516.9 (w), 1278.4 (w), 1098.0 (w), 1009.5 (w).  $\nu_{\max}(\text{ATR})/\text{cm}^{-1}$  3417.6 (w), 2962.0 (w), 2926.0 (w), 2854.1 (w), 1677.1 (w), 1513.6 (w), 1259.2 (w), 1087.3 (w), 1011.4 (w), 795.0 (w).  $\lambda_{\max}(\text{CH}_2\text{Cl}_2)/\text{nm}$  420, 576 (log  $\epsilon_M$  4.58 and 3.35). ESR data (experimental X-band (9.462 GHz) sample powder, 77 K): High spin S = 5/2 confirmed by the g tensor values ( $g_{\perp} = 5.71$  and  $g_{\parallel} = 2.00$ ).  $[\alpha]_D^{20} = -625.000$  (c = 8×10<sup>-4</sup> g/100mL; in CH<sub>2</sub>Cl<sub>2</sub>). m/z (ESI) 1875.5 [M+Na<sup>+</sup>].

### Catalytic procedures.

**Method a (runs 1-5, Table 1):** In a typical run, **2Fe** (5.0 mg, 2.70×10<sup>-6</sup> mol) was dissolved in the desired solvent (5.0 mL) and then  $\alpha$ -methylstyrene (0.88 mL, 6.75 ×10<sup>-4</sup> mol) and ethyl diazoacetate (EDA) (0.028 mL, 2.70×10<sup>-4</sup> mol) were added. The consumption of EDA was monitored by IR spectroscopy by measuring the decrease of the characteristic N<sub>2</sub> absorbance at 2114 cm<sup>-1</sup>. The reaction was considered to be finished when the measured EDA absorbance was below 0.03 (by using a 0.5 mm-thickness cell). The solution was then evaporated to dryness and analysed by <sup>1</sup>H NMR with 2,4-dinitrotoluene as an internal standard, and by HPLC by using a chiral column (DAI-CEL CHRALCEL, IB, *n*-hexane/*i*-PrOH 99.5:0.5). **Method b (run 1, Table 2):** The procedure illustrated for *method a* was repeated by using an equimolar  $\alpha$ -methylstyrene/EDA ratio (0.035 mL, 2.70×10<sup>-4</sup> mol/ 0.028 mL, 2.70×10<sup>-4</sup> mol). **Method c (runs 2-4 and 6-9, Table 2):** 145.0  $\mu$ L of a **2Fe** toluene solution (3.72×10<sup>-3</sup> mol/L) was dissolved in 2.0 mL of toluene before adding equimolar amounts of  $\alpha$ -methylstyrene and EDA. **Method d (run 5, Table 2):** The procedure *e* was repeated by adding EDA dropwise by a syringe pump to the reaction mixture.

### Recycle of catalyst **2Fe**.

$\alpha$ -Methylstyrene (0.421 mL, 3.24×10<sup>-3</sup> mol) and ethyl diazoacetate (EDA) (0.340 mL, 3.24×10<sup>-3</sup> mol) were added to a toluene solution (17.0 mL) of **2Fe** (6.0 mg, 3.24×10<sup>-6</sup> mol) at 0°C under nitrogen atmosphere. The consumption of EDA was monitored by IR spectroscopy by measuring the characteristic N<sub>2</sub> absorbance at 2114 cm<sup>-1</sup>. After the complete EDA consumption, EDA and  $\alpha$ -methylstyrene were added again to the catalytic mixture for two more consecutive times. The NMR analyses of the crude revealed 90% of global yield, 98% of *trans*-diastereoselectivity with 75% of  $ee_{trans}$ .

### UV-Vis spectra.

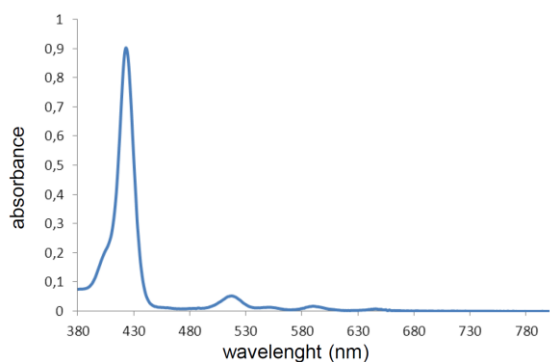

**Figure S1.** UV-vis spectrum of **2** in CH<sub>2</sub>Cl<sub>2</sub>

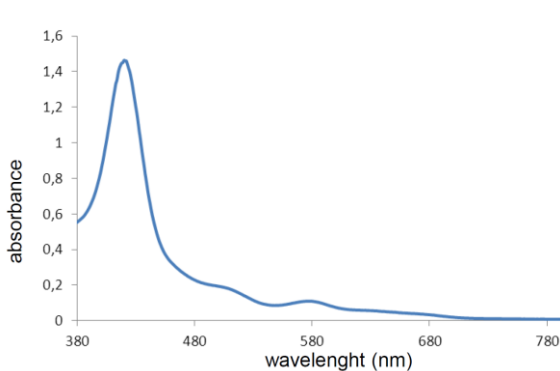

**Figure S2.** UV-vis spectrum of **2Fe** in CH<sub>2</sub>Cl<sub>2</sub>

### IR spectra.

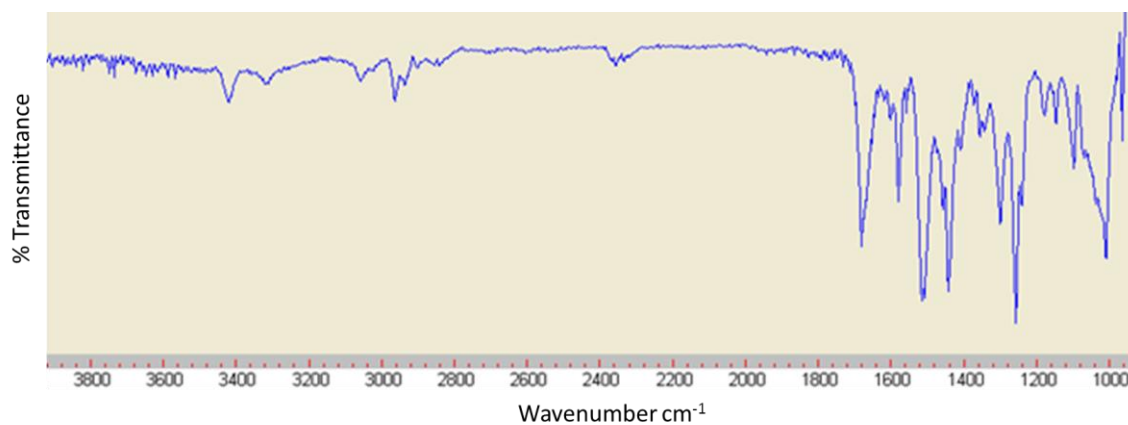

**Figure S3.** IR spectrum (ATR) of compound **2**

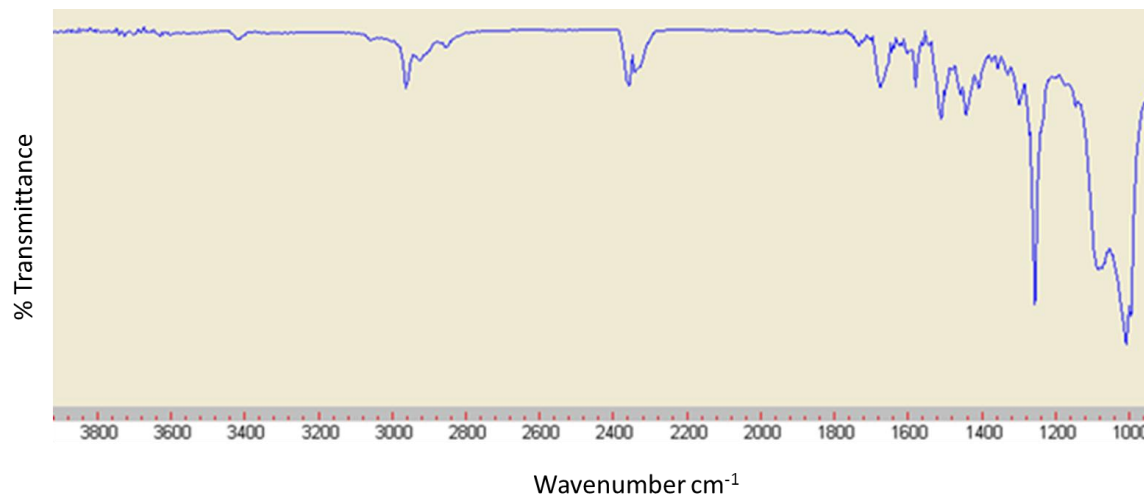

**Figure S4.** IR spectrum (ATR) of complex **2Fe**

### NMR spectra

(a)

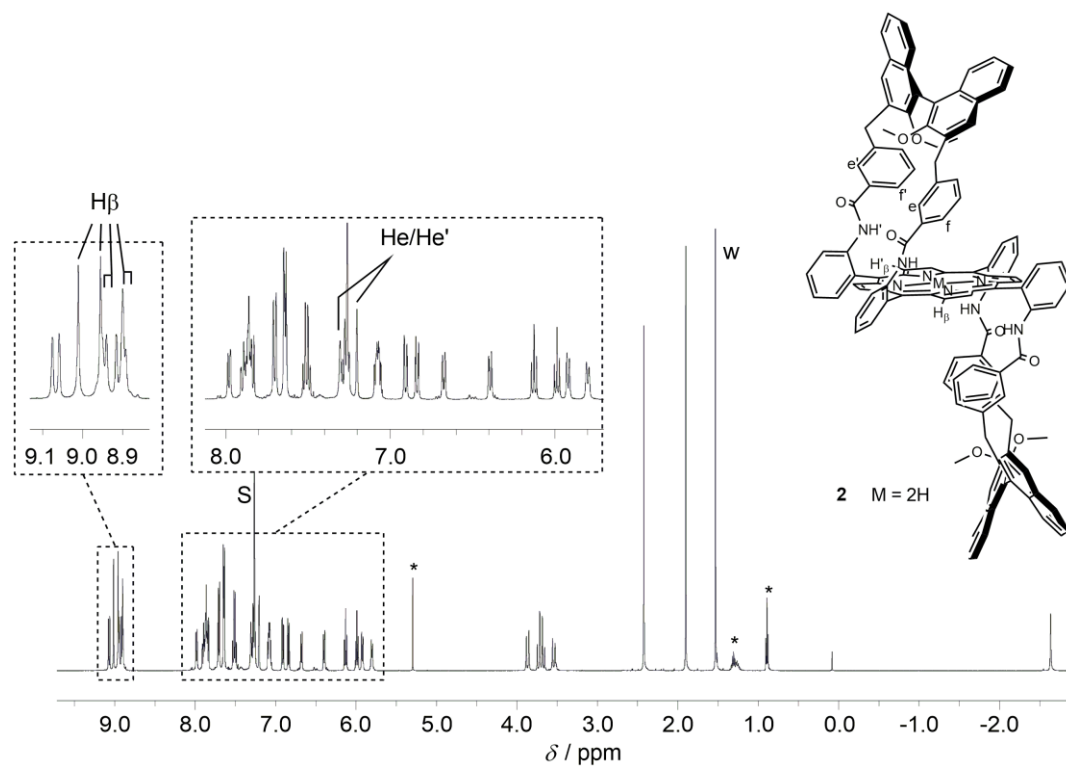

(b)

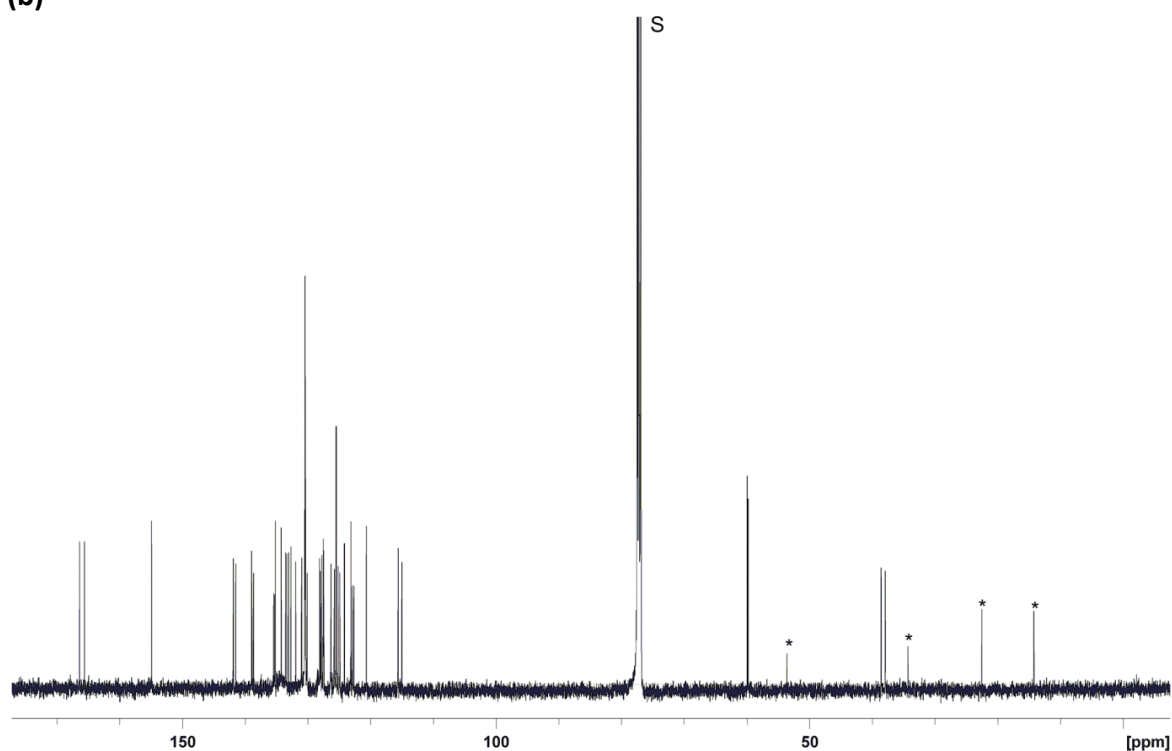

**Figure S5.** (a)  $^1\text{H}$  NMR spectrum (500 MHz, 298 K) of compound **2** in  $\text{CDCl}_3$ . (b)  $^{13}\text{C}$  NMR spectrum (125 MHz, 298 K) of compound **2** in  $\text{CDCl}_3$ . (S =  $\text{CHCl}_3$ , w = water, \* = traces of residual solvents or grease).

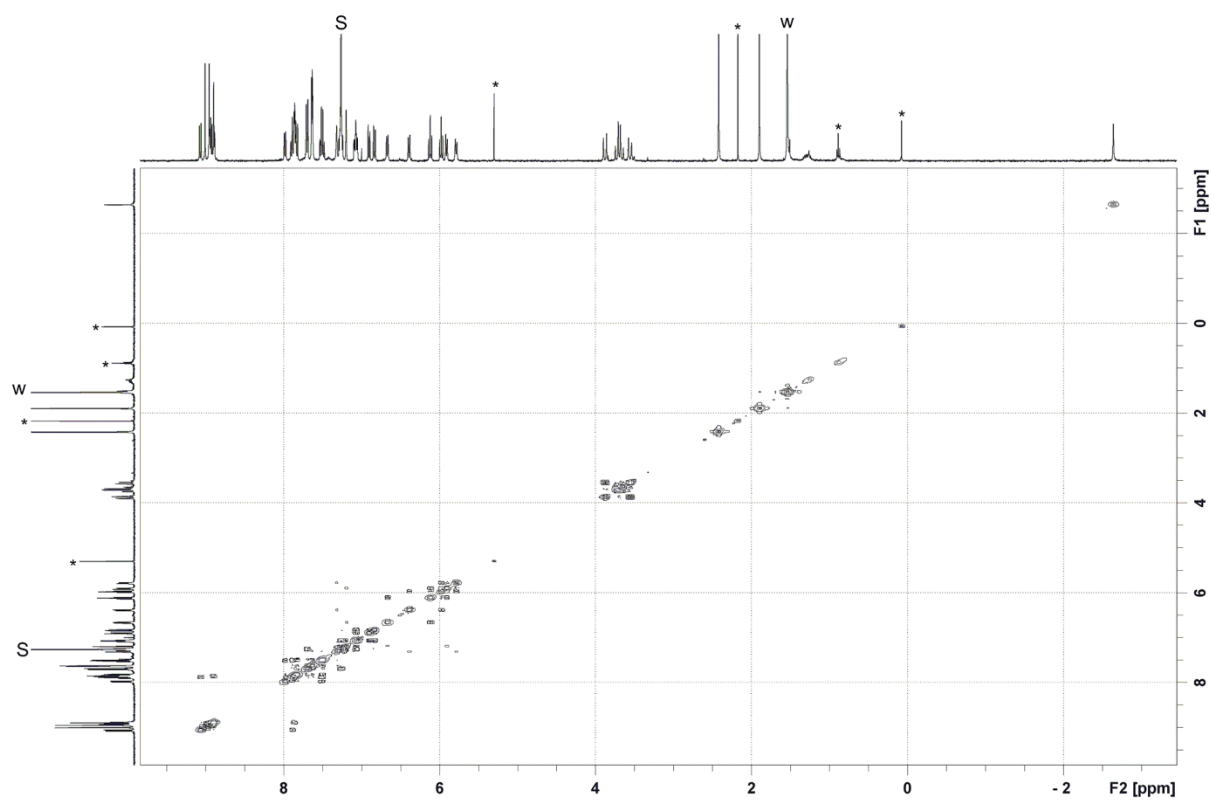

**Figure S6.** COSY 2D NMR spectrum (500 MHz, 298 K) of compound **2** in  $\text{CDCl}_3$  (S =  $\text{CHCl}_3$ , w = water, \* = traces of residual solvents or grease).

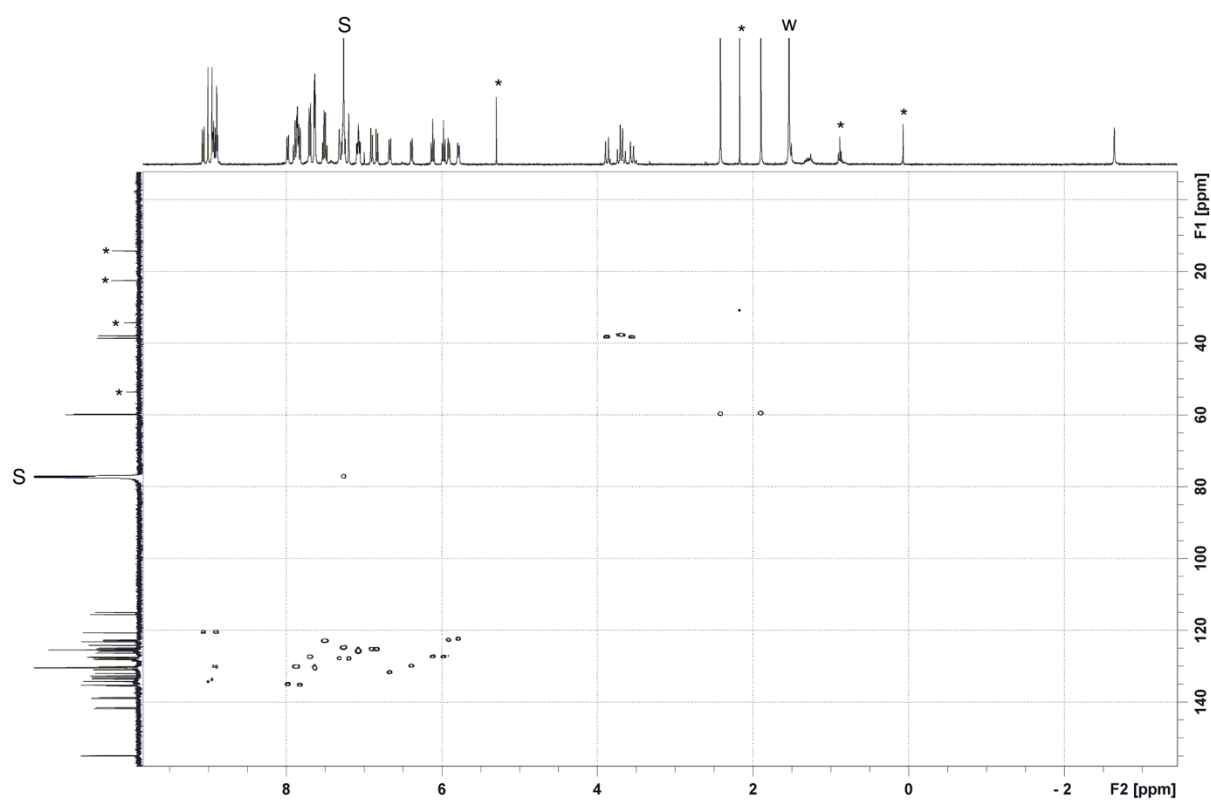

**Figure S7.** HMQC 2D NMR spectrum (500 MHz, 298 K) of compound **2** in  $\text{CDCl}_3$  (S =  $\text{CHCl}_3$ , w = water, \* = traces of residual solvents or grease).

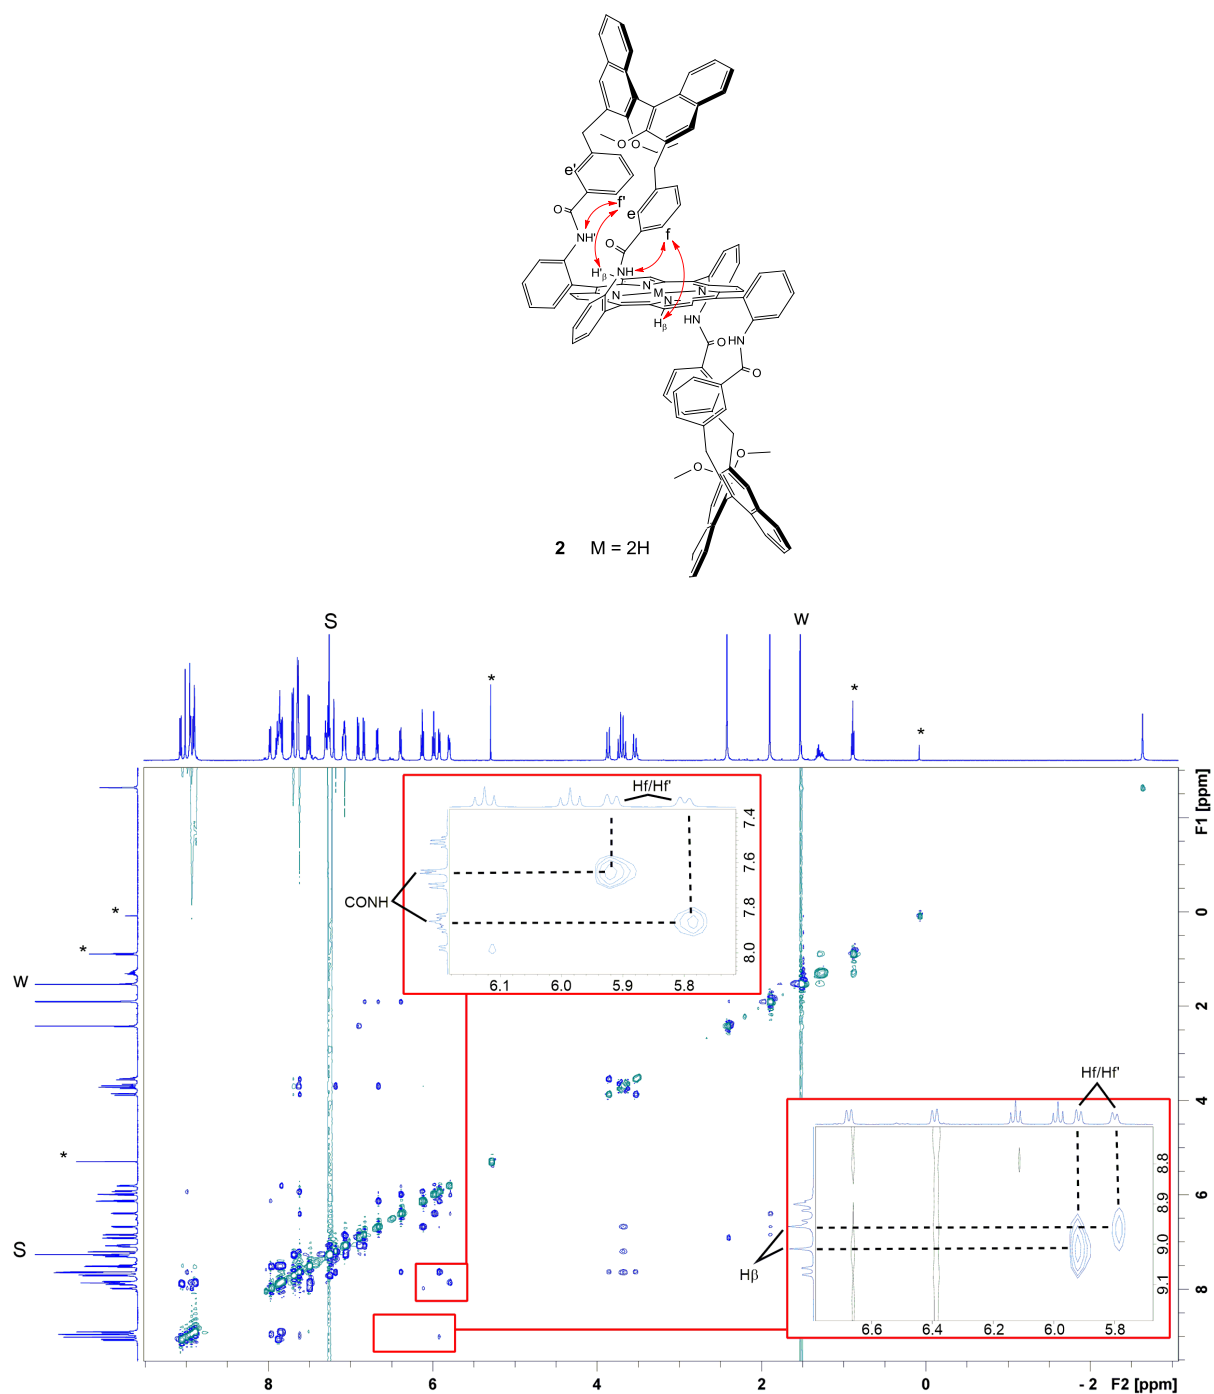

**Figure S8.** ROESY 2D NMR spectrum (500 MHz, 298 K) of compound **2** in  $\text{CDCl}_3$  (S =  $\text{CHCl}_3$ , w = water, \* = traces of residual solvents or grease). Expanded regions showing NOE cross-peaks between Hf and both the amide and  $\text{H}\beta$  protons.

### MS-ESI spectra

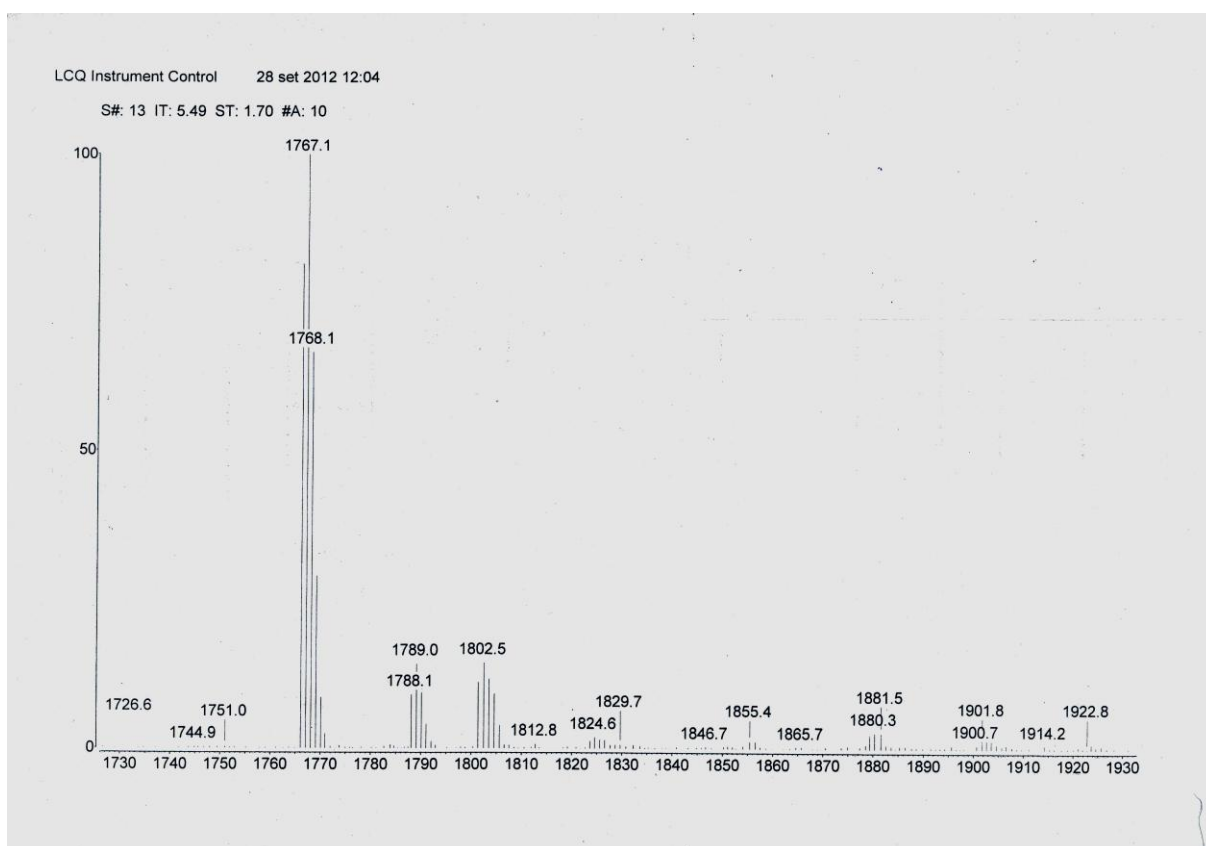

**Figure S9.** MS-ESI spectrum of compound 2 [ $M^+$ ]



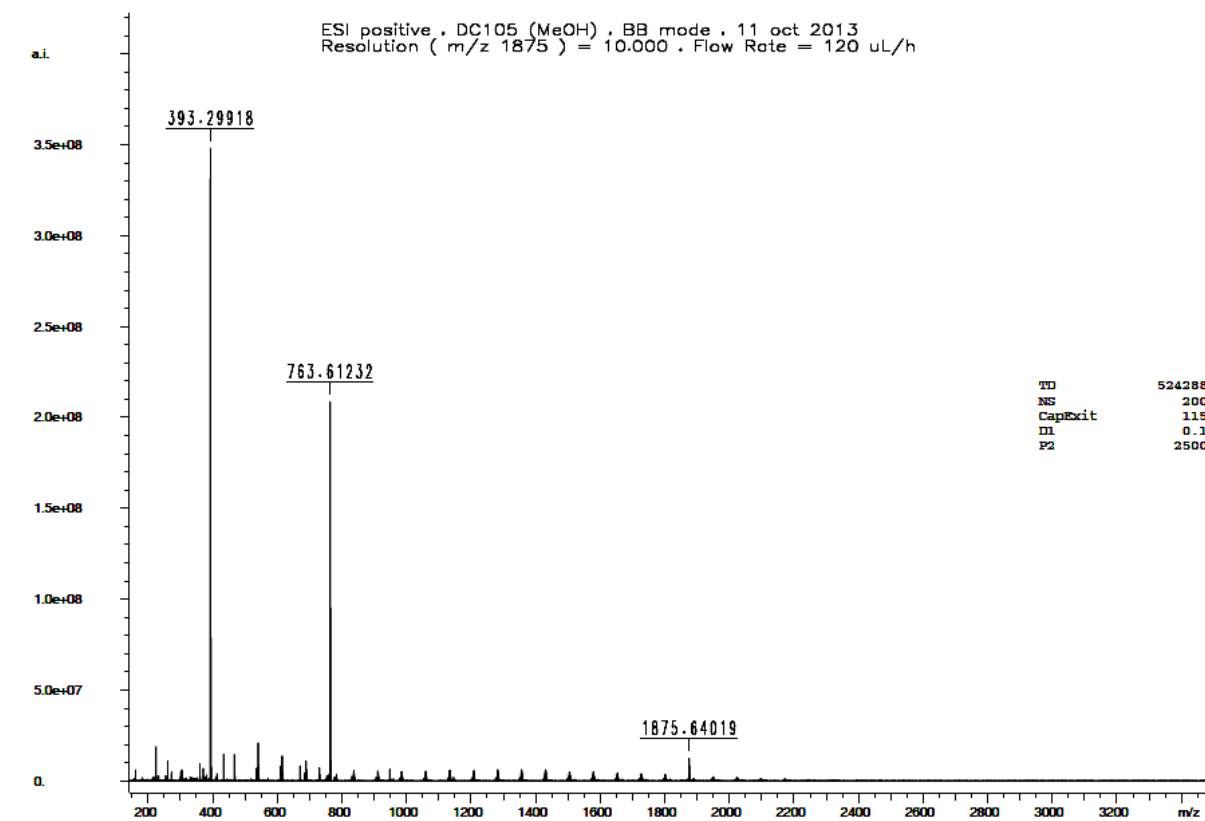

/D=/DATA/CIGA/Chim/2013/Gallo/DC105/9/pdata/1 Administrator Fri Oct 11 17:05:22 2013

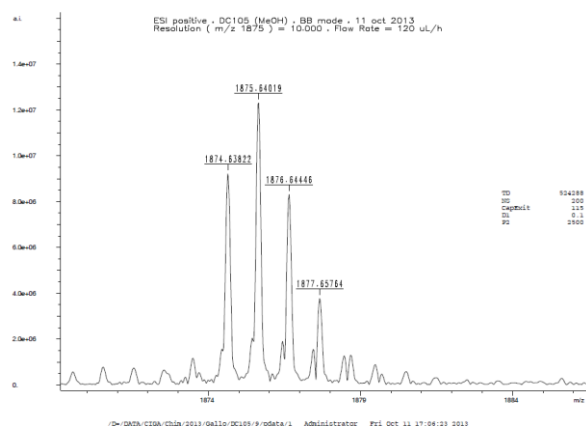

a) Experimental MS-ESI spectrum

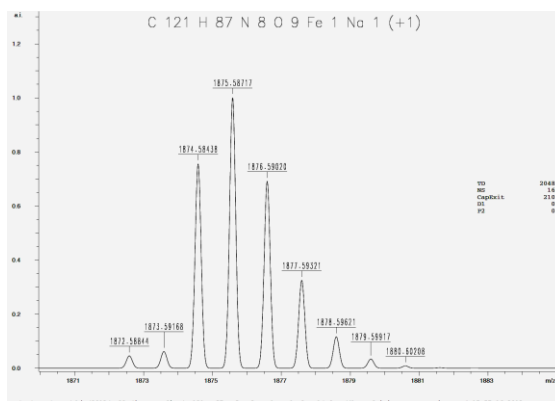

b) Simulation of MS-ESI spectrum

Figure S10. MS-ESI spectrum of complex  $2Fe [M+Na^+]$

### NMR and HPLC spectra of catalytic reactions

|               |                                                                                                                                                                                                        |
|---------------|--------------------------------------------------------------------------------------------------------------------------------------------------------------------------------------------------------|
| <b>Legend</b> | <p><b>S</b> Internal standard 2,4-dinitrotoluene</p> <p>○ Maleate</p> <p>○ Fumarate</p> <p>△ <math>\alpha</math>-methylstyrene</p> <p>☆ Cyclopropane <i>trans</i></p> <p>□ Cyclopropane <i>cis</i></p> |
|---------------|--------------------------------------------------------------------------------------------------------------------------------------------------------------------------------------------------------|

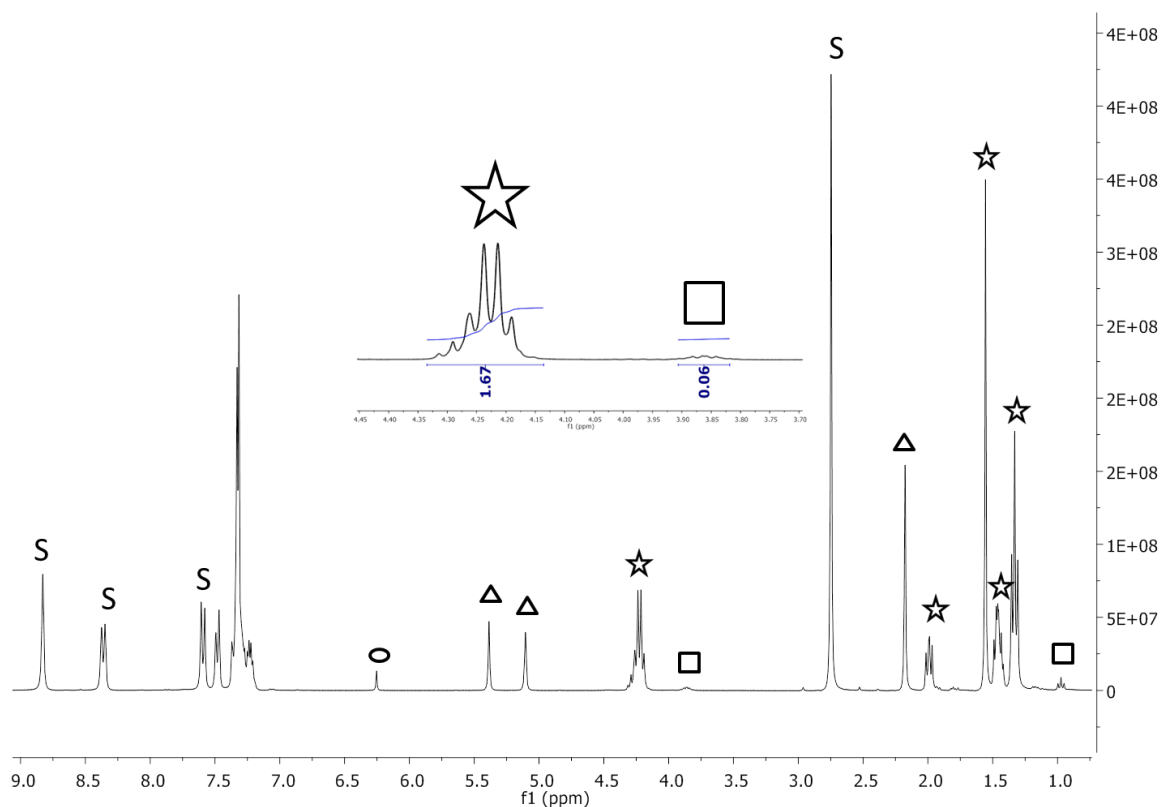

**Figure S11.**  $^1\text{H}$  NMR ( $\text{CDCl}_3$ ) spectrum of entry 1, Table 1.

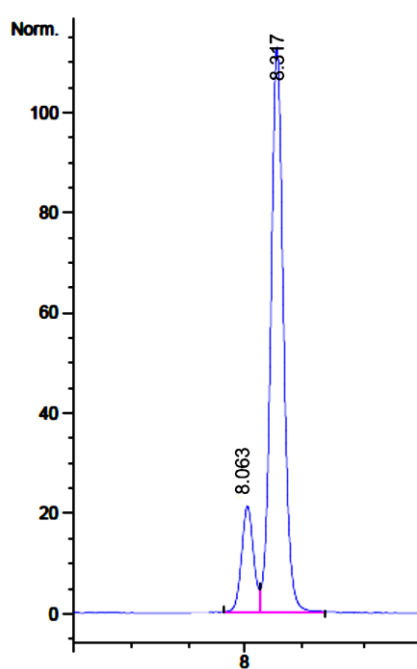

**Figure S12.** HPLC spectrum of entry 1, Table 1.

DAI-CEL CHRALCEL, IB, n-hexane/i-PrOH 99.5:0.5

| peak | time (min) | area   | percent |
|------|------------|--------|---------|
| 1    | 8.063      | 14,066 |         |
| 2    | 8.317      | 85,936 |         |
|      |            |        | 100,000 |

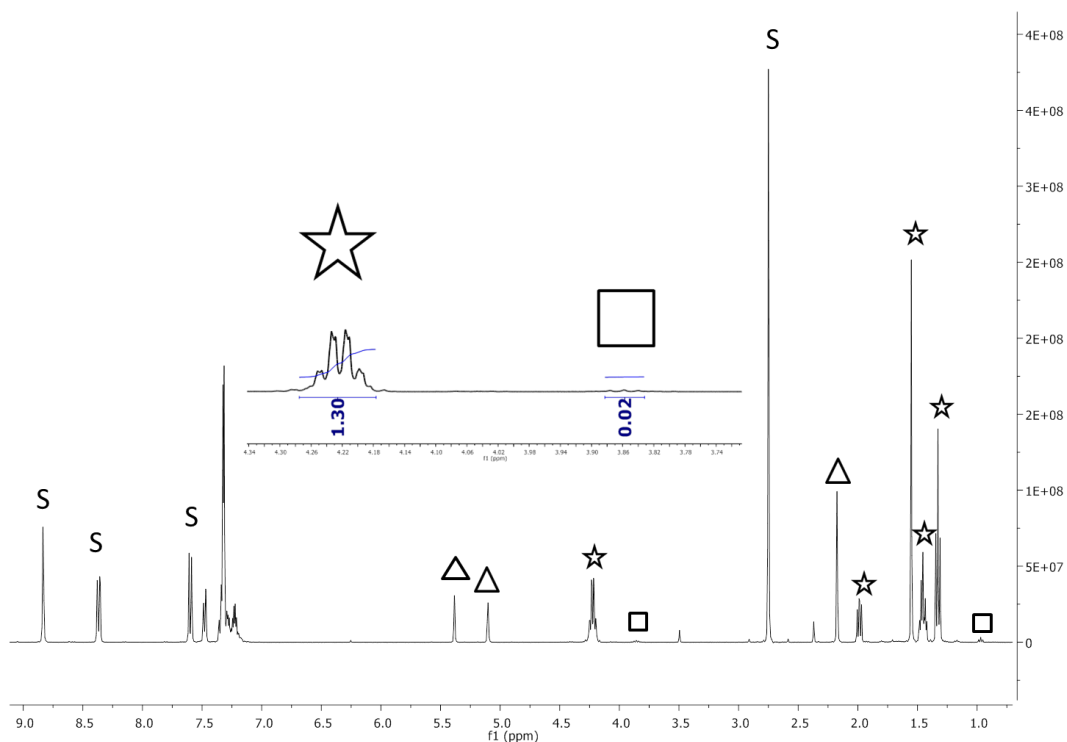

Figure S13.  $^1\text{H}$  NMR ( $\text{CDCl}_3$ ) spectrum of entry 2, Table 1.

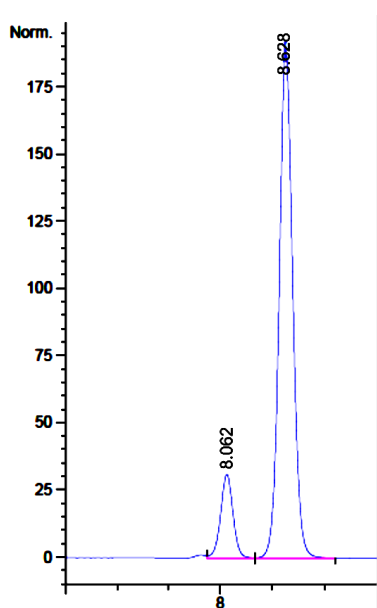

Figure S14. HPLC spectrum of entry 2, Table 1.

DAI-CEL CHRALCEL, IB, n-hexane/i-PrOH 99.5:0.5

| peak | time (min) | area   | percent |
|------|------------|--------|---------|
| 1    | 8.062      | 12,656 |         |
| 2    | 8.628      | 87,344 |         |

100,000

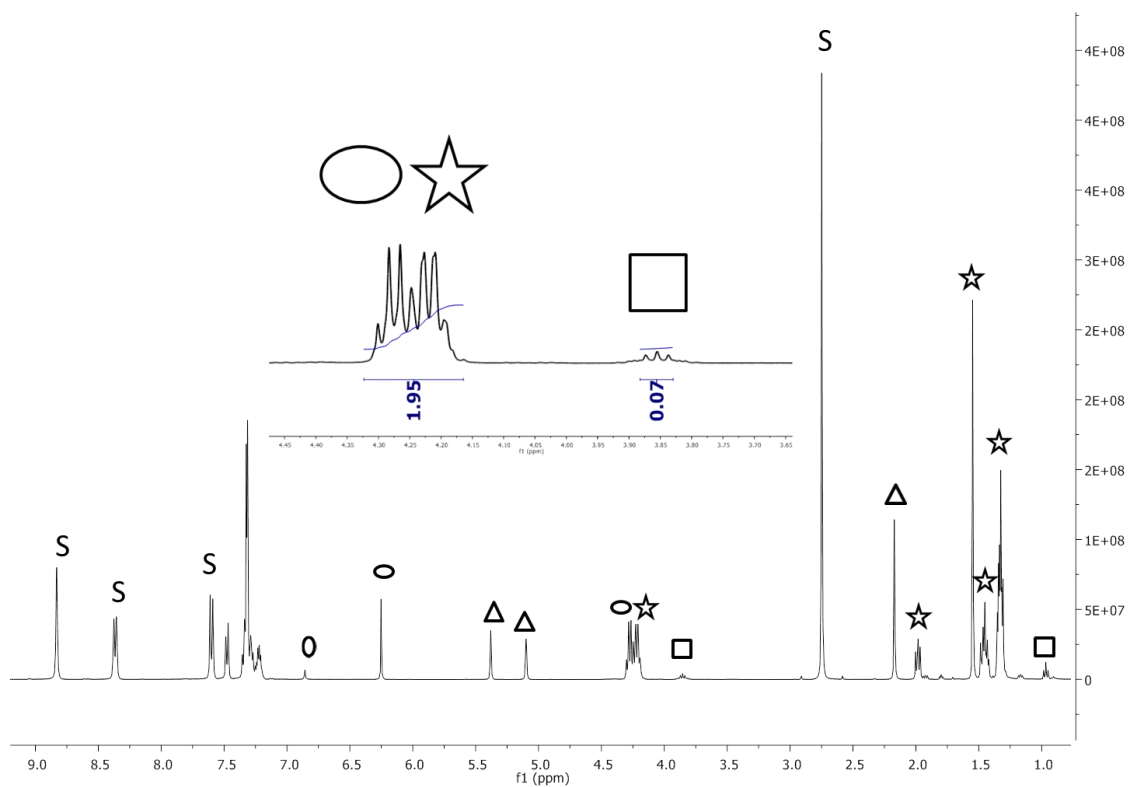

Figure S15.  $^1\text{H}$  NMR ( $\text{CDCl}_3$ ) spectrum of entry 4, Table 1.

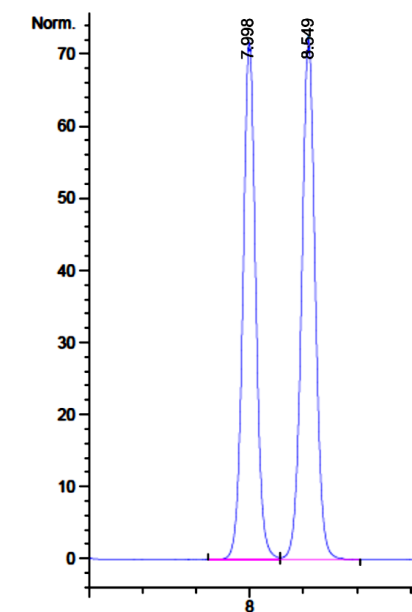

Figure S16. HPLC spectrum of entry 4, Table 1.

DAI-CEL CHRALCEL, IB, n-hexane/i-PrOH 99.5:0.5

| peak | time (min) | area percent |
|------|------------|--------------|
| 1    | 7.998      | 30.381       |
| 2    | 8.549      | 69.919       |

100,000

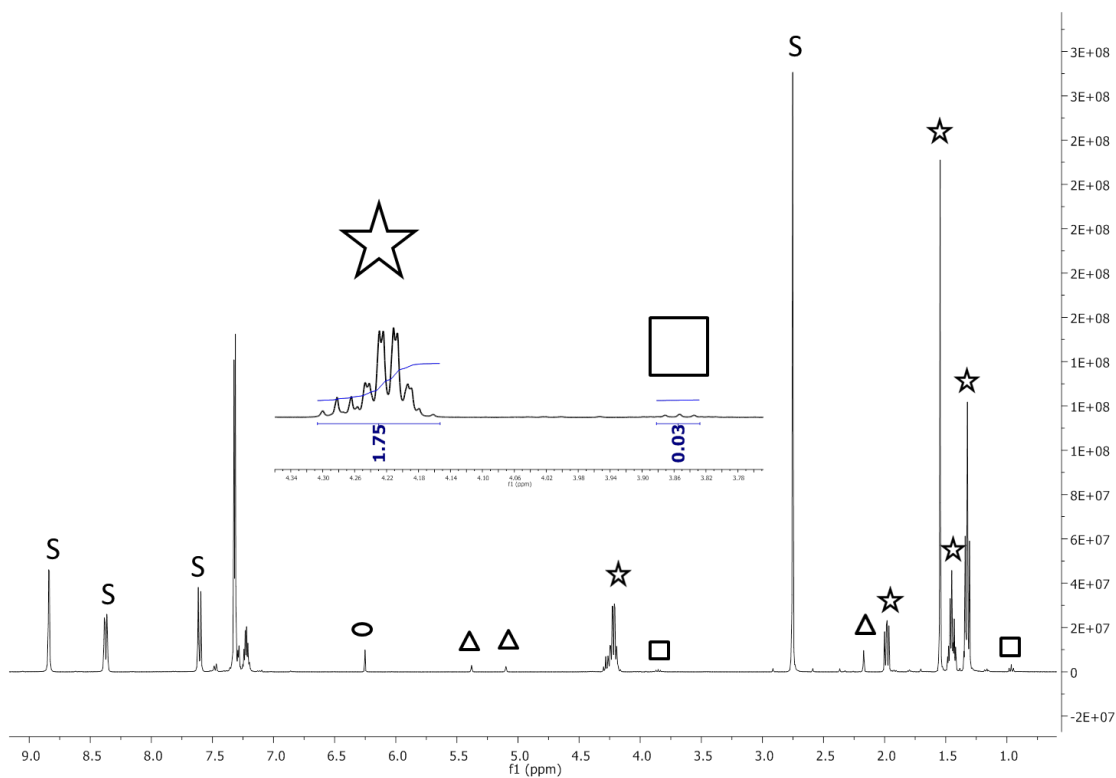

**Figure S17.**  $^1\text{H}$  NMR ( $\text{CDCl}_3$ ) spectrum of entry 5, Table 1.

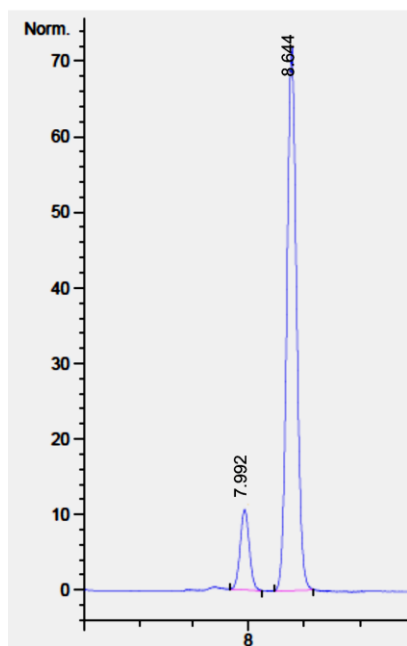

**Figure S18.** HPLC spectrum of entry 5, Table 1.

DAI-CEL CHRALCEL, IB, n-hexane/i-PrOH 99.5:0.5

| peak | time (min) | area    | percent |
|------|------------|---------|---------|
| 1    | 7.992      | 12,322  |         |
| 2    | 8.644      | 87,678  |         |
|      |            | 100,000 |         |

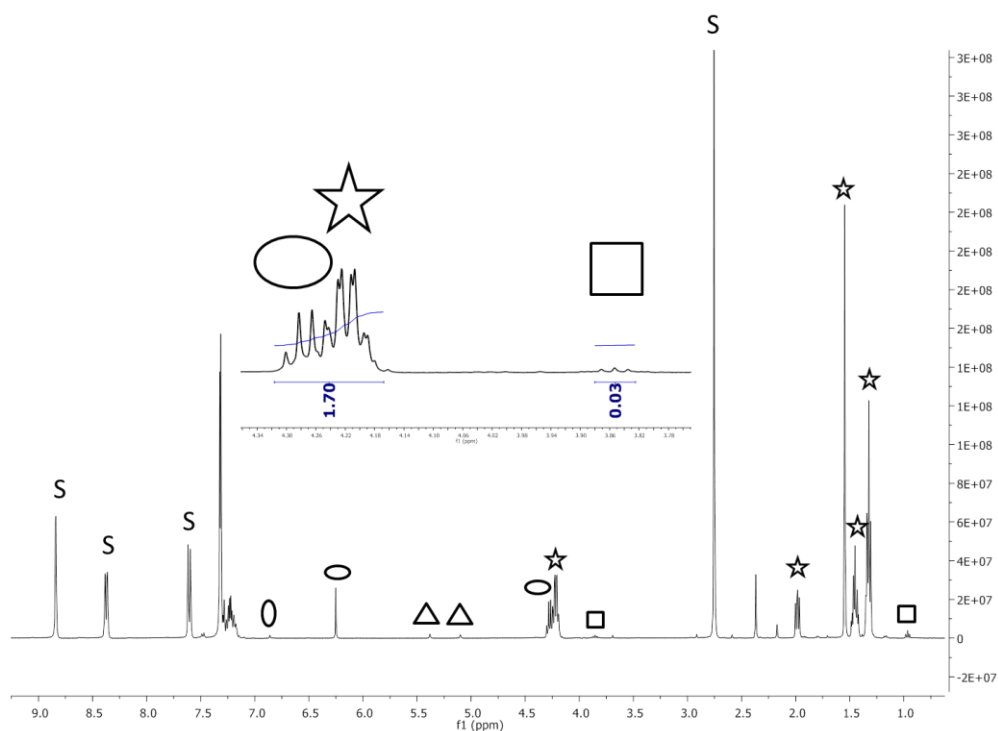

Figure S19.  $^1\text{H}$  NMR ( $\text{CDCl}_3$ ) spectrum of entry 1, Table 2.

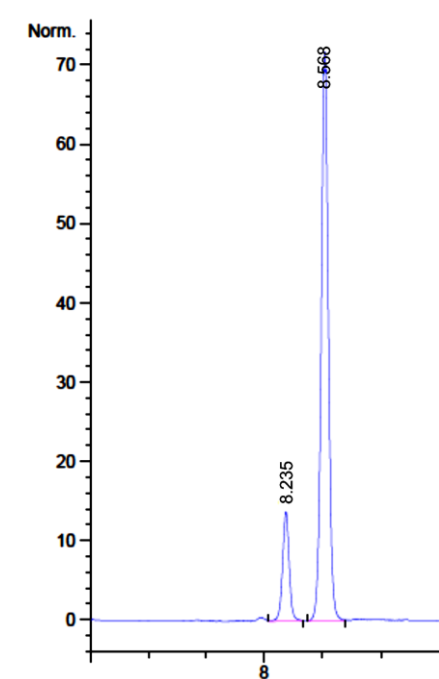

Figure S20. HPLC spectrum of entry 1, Table 2.

DAI-CEL CHRALCEL, IB, n-hexane/i-PrOH 99.5:0.5

| peak | time (min) | area   | percent |
|------|------------|--------|---------|
| 1    | 8.325      | 13,663 |         |
| 2    | 8.568      | 86,337 |         |
|      |            |        | 100,000 |

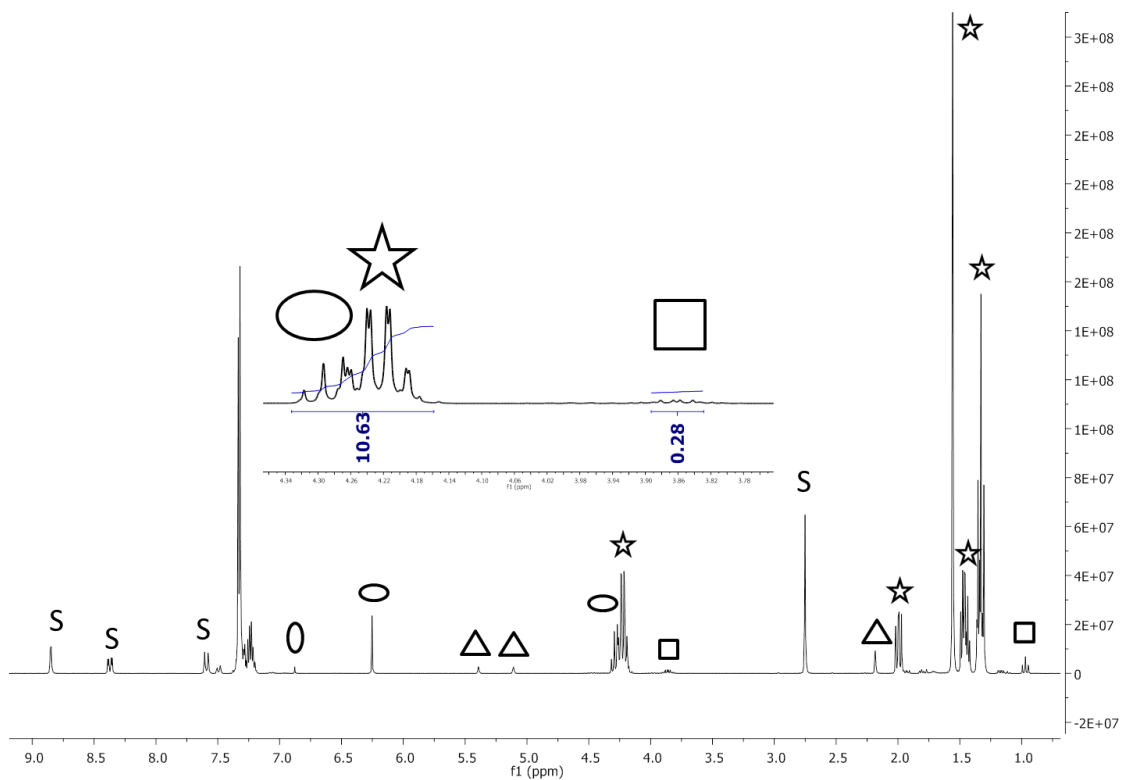

Figure S21.  $^1\text{H}$  NMR ( $\text{CDCl}_3$ ) spectrum of entry 2, Table 2.

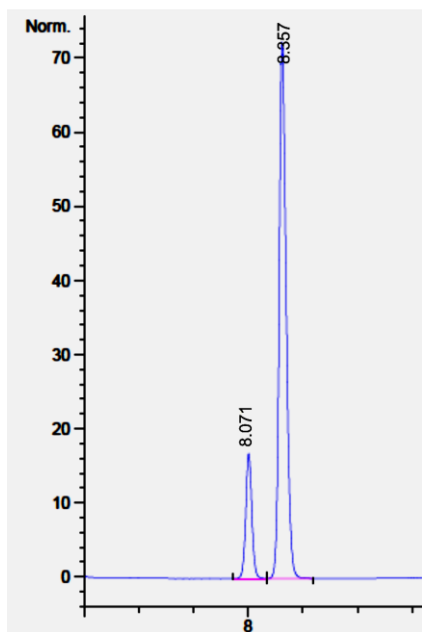

Figure S22. HPLC spectrum of entry 2, Table 2.

DAI-CEL CHRALCEL, IB, n-hexane/i-PrOH 99.5:0.5

| peak | time (min) | area    | percent |
|------|------------|---------|---------|
| 1    | 8.071      | 16,205  |         |
| 2    | 8.357      | 83,795  |         |
|      |            | 100,000 |         |



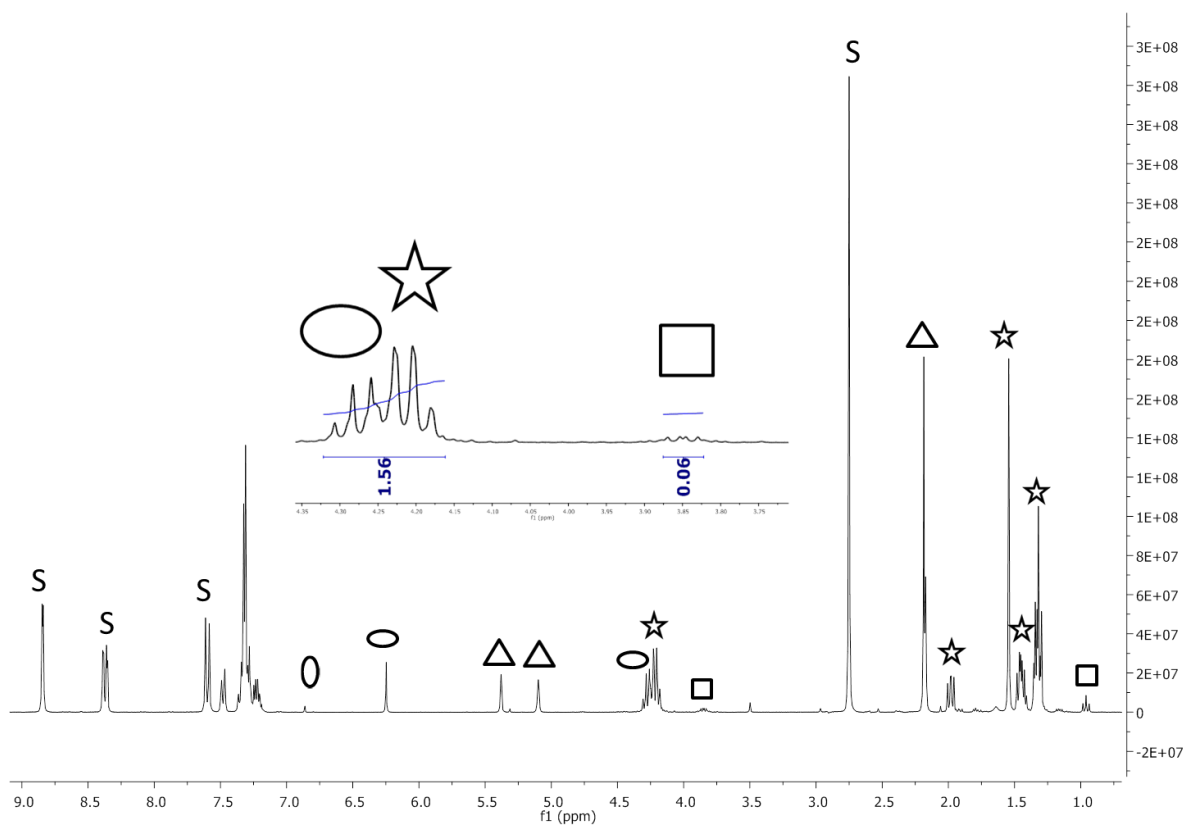

Figure S23.  $^1\text{H}$  NMR ( $\text{CDCl}_3$ ) spectrum of entry 3, Table 2.

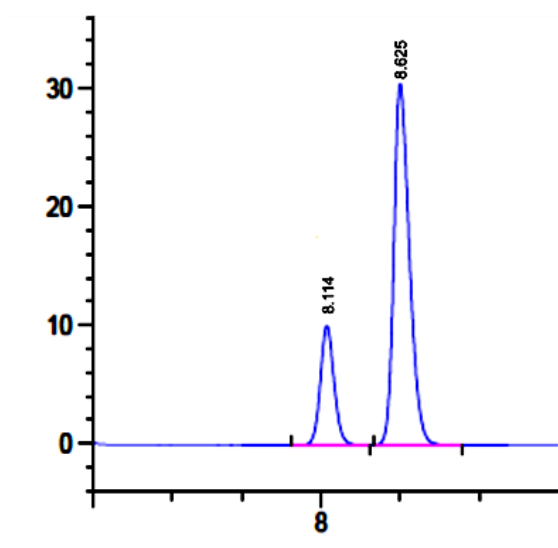

Figure S24. HPLC spectrum of entry 3, Table 2.

DAI-CEL CHRALCEL, IB, n-hexane/*i*-PrOH 99.5:0.5

| peak | time (min) | area   | percent |
|------|------------|--------|---------|
| 1    | 8.114      | 20,998 |         |
| 2    | 8.625      | 79,002 |         |
|      |            |        | 100,000 |

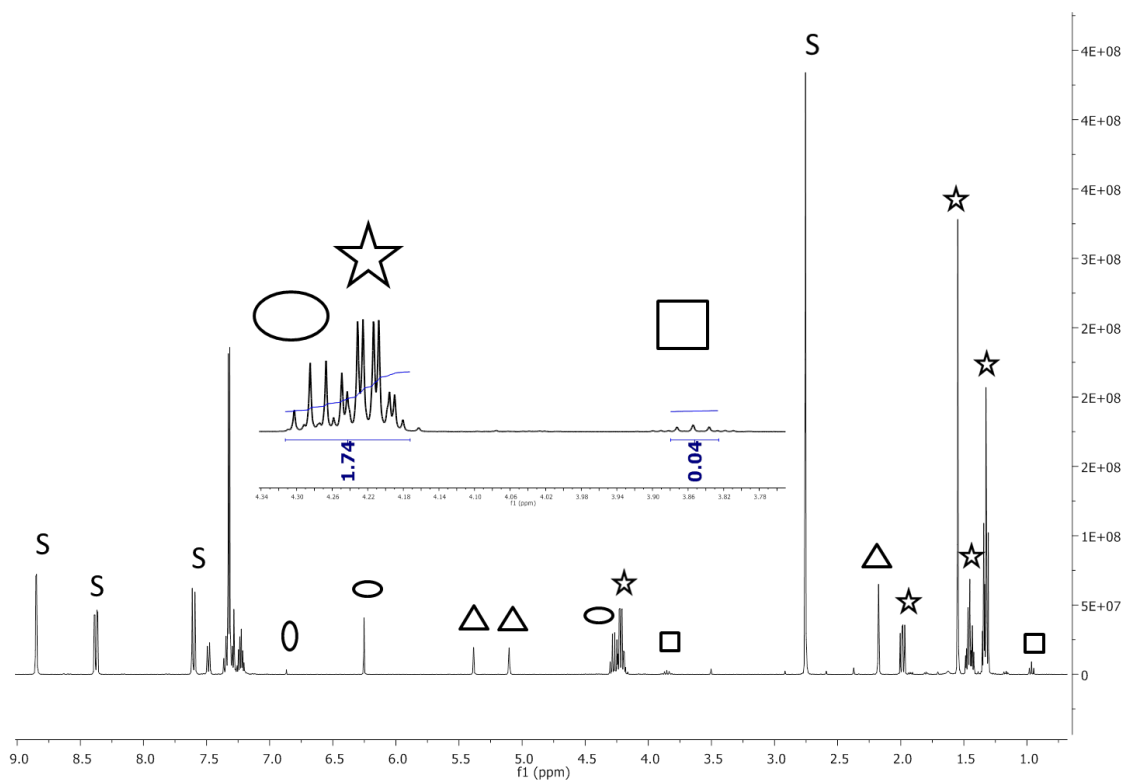

Figure S25.  $^1\text{H}$  NMR ( $\text{CDCl}_3$ ) spectrum of entry 4, Table 2.

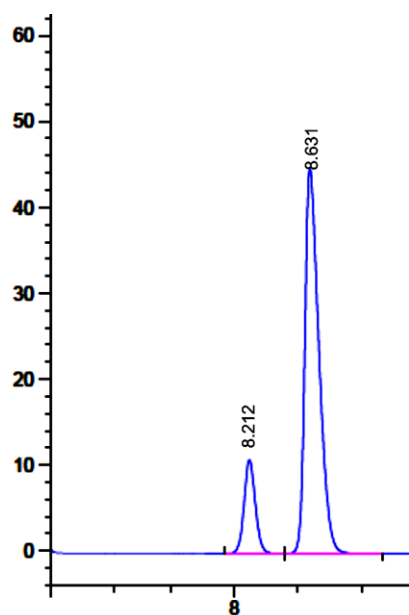

Figure S26. HPLC spectrum of entry 4, Table 2.

DAI-CEL CHRALCEL, IB, n-hexane/i-PrOH 99.5:0.5

| peak | time (min) | area   | percent |
|------|------------|--------|---------|
| 1    | 8.212      | 11,255 |         |
| 2    | 8.631      | 88,745 |         |
|      |            |        | 100,000 |

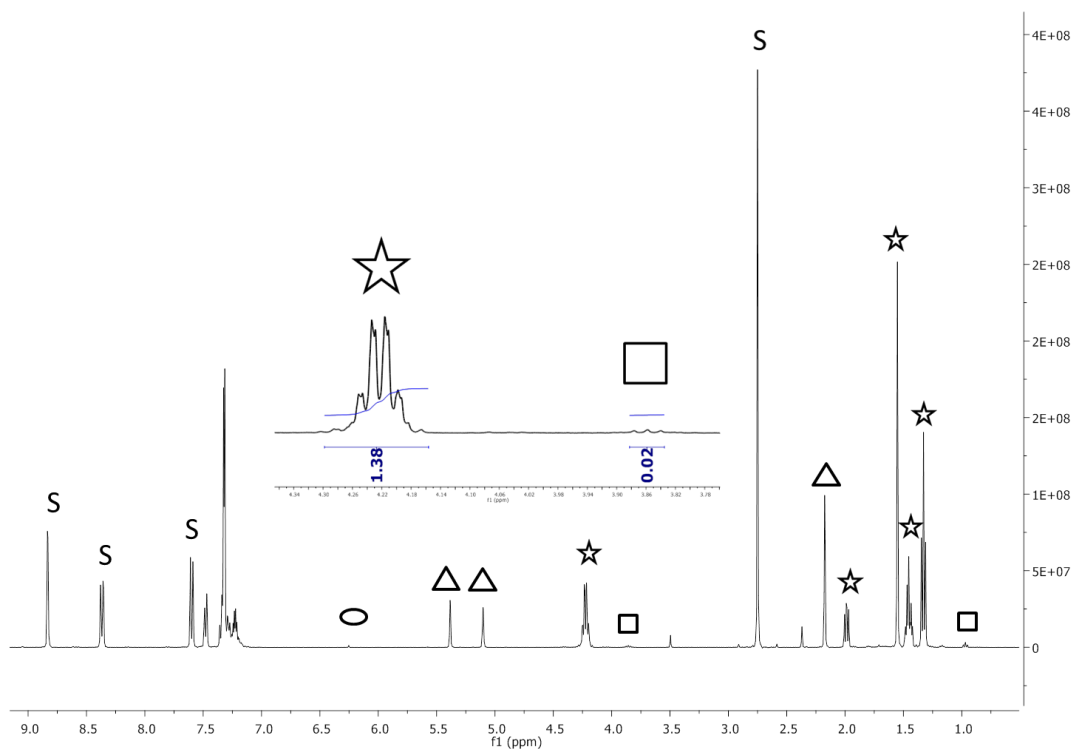

Figure S27.  $^1\text{H}$  NMR ( $\text{CDCl}_3$ ) spectrum of entry 5, Table 2.

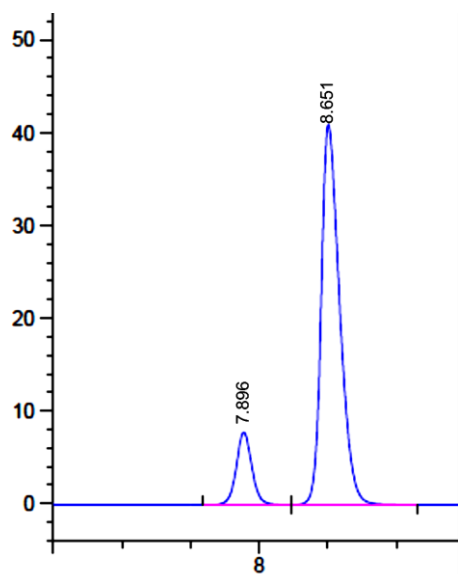

Figure S28. HPLC spectrum of entry 5, Table 2.

DAI-CEL CHRALCEL, IB, n-hexane/i-PrOH 99.5:0.5

| peak | time (min) | area percent |
|------|------------|--------------|
| 1    | 7.896      | 13,029       |
| 2    | 8.651      | 86,971       |
|      |            | 100,000      |

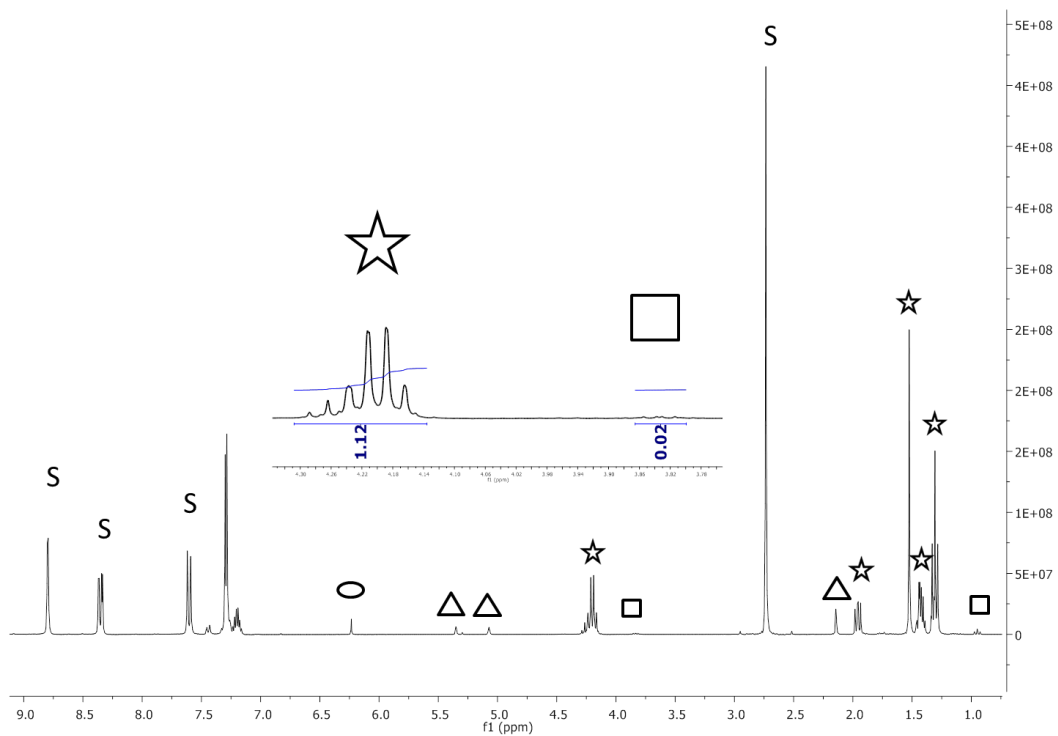

Figure S29. <sup>1</sup>H NMR (CDCl<sub>3</sub>) spectrum of entry 6, Table 2.

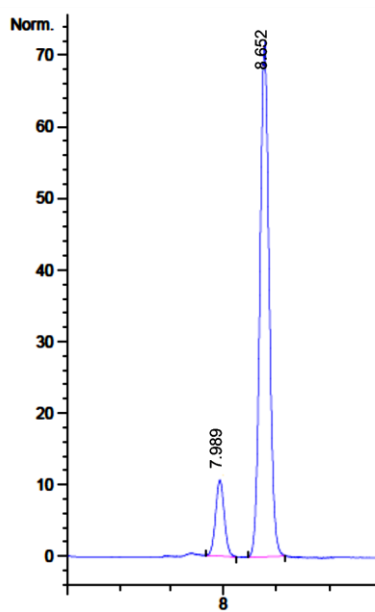

Figure S30. HPLC spectrum of entry 6, Table 2.

DAI-CEL CHRALCEL, IB, n-hexane/i-PrOH 99.5:0.5

| peak | time (min) | area percent |
|------|------------|--------------|
| 1    | 7.989      | 10,551       |
| 2    | 8.652      | 89,449       |
|      |            | 100,000      |

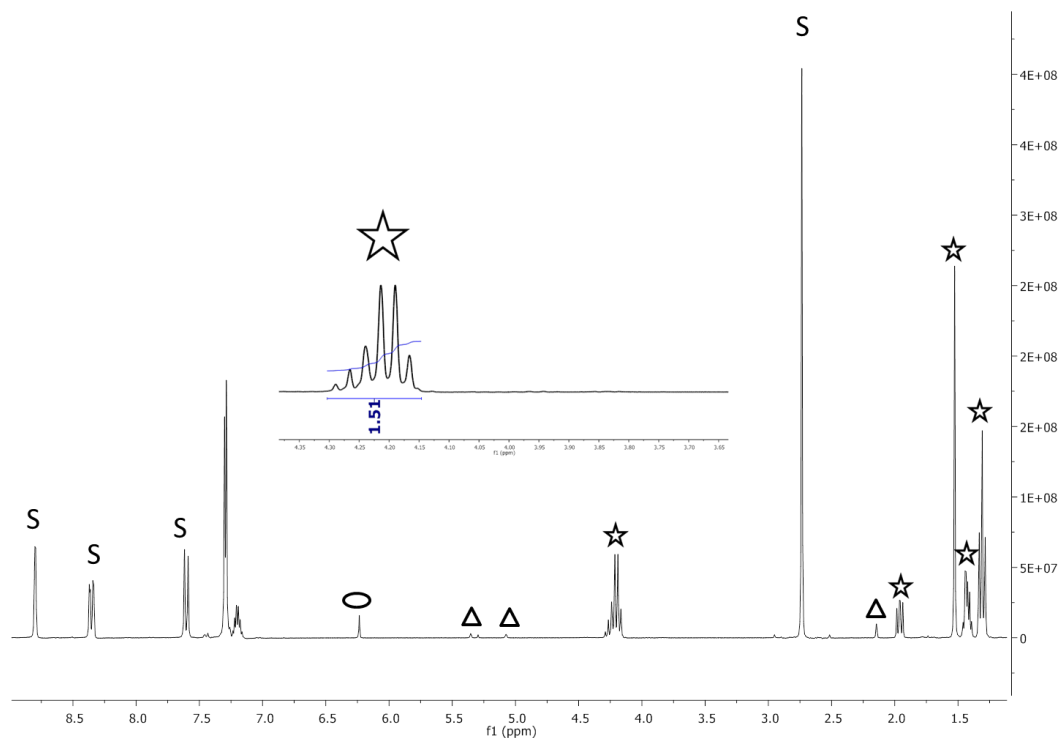

Figure S31.  $^1\text{H}$  NMR ( $\text{CDCl}_3$ ) spectrum of entry 7, Table 2.

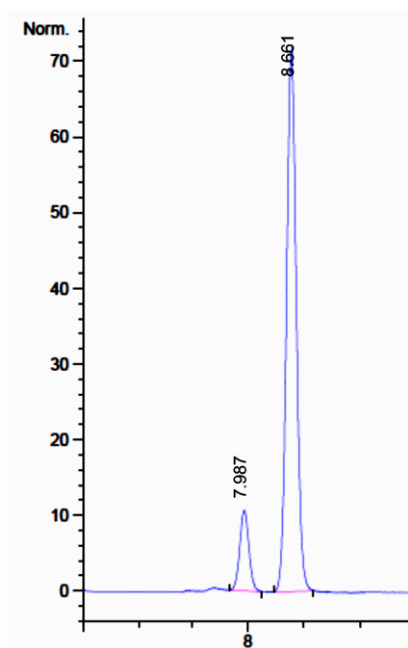

Figure S32. HPLC spectrum of entry 7, Table 2.

DAI-CEL CHRALCEL, IB, n-hexane/*i*-PrOH 99.5:0.5

| peak | time (min) | area   | percent |
|------|------------|--------|---------|
| 1    | 7.987      | 10,638 |         |
| 2    | 8.661      | 89,362 |         |
|      |            |        | 100,000 |

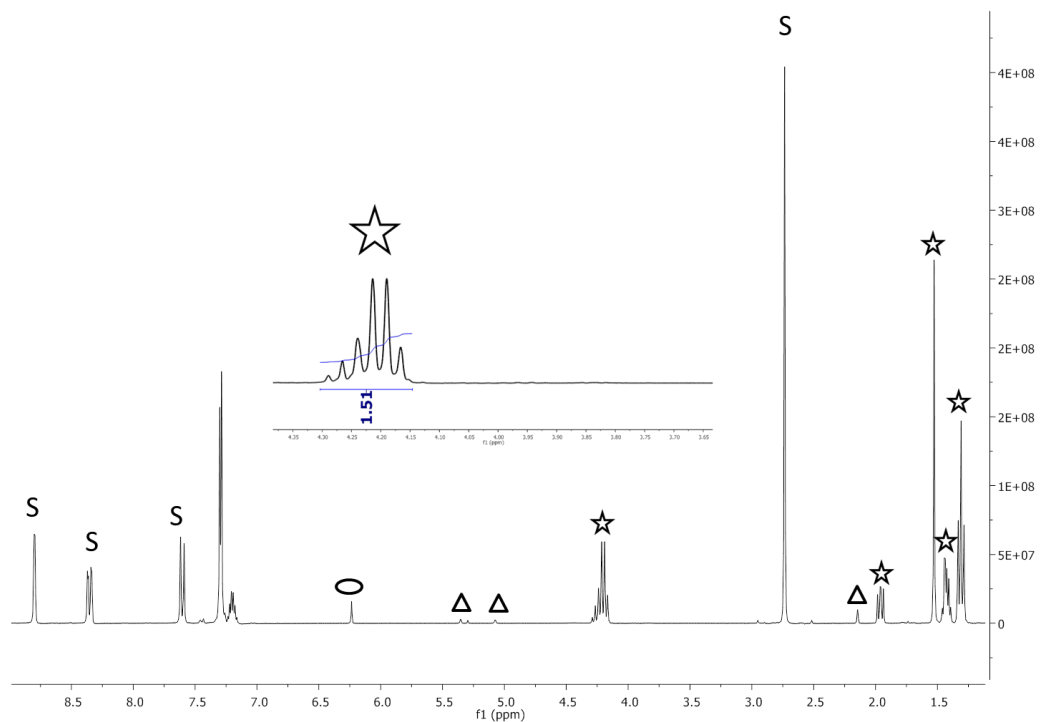

Figure S33.  $^1\text{H}$  NMR ( $\text{CDCl}_3$ ) spectrum of entry 8, Table 2.

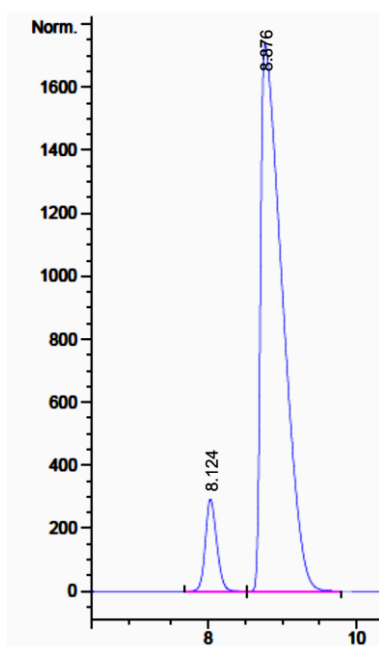

Figure S34. HPLC spectrum of entry 8, Table 2.

DAI-CEL CHRALCEL, IB, n-hexane/i-PrOH 99.5:0.5

| peak | time (min) | area percent |
|------|------------|--------------|
| 1    | 8.124      | 6,666        |
| 2    | 8.876      | 93,334       |
|      |            | 100,000      |

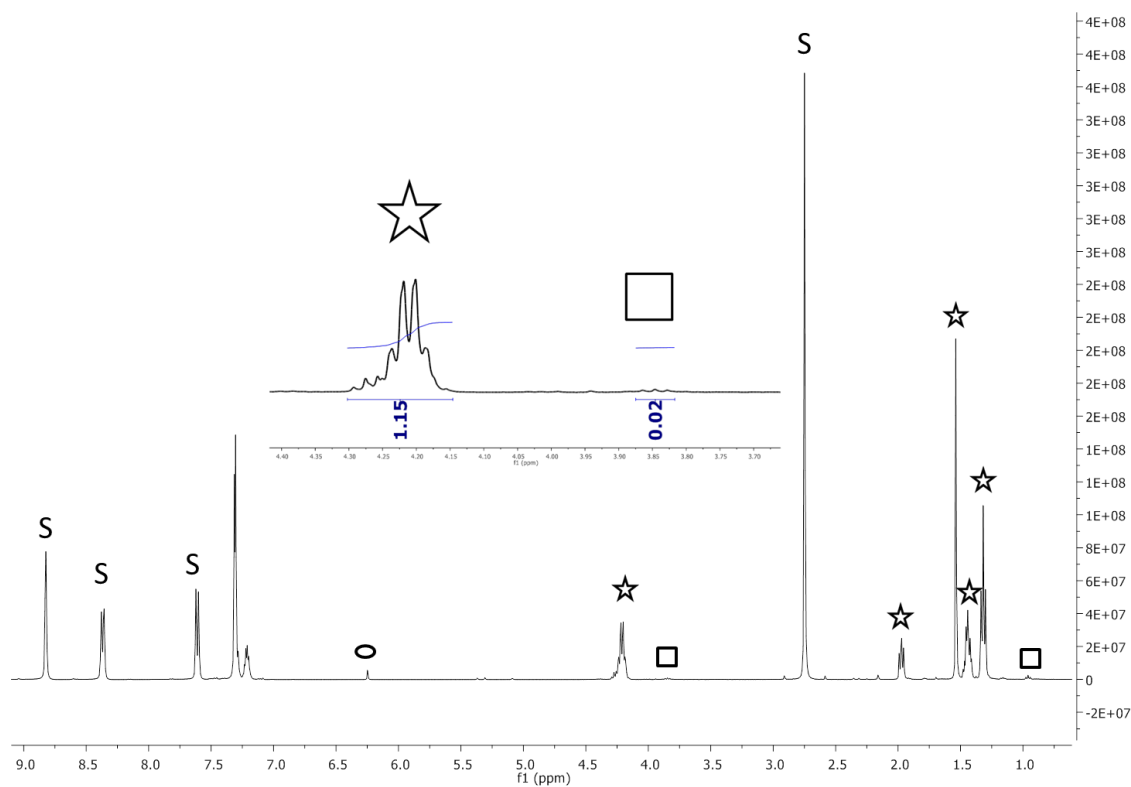

Figure S35.  $^1\text{H}$  NMR ( $\text{CDCl}_3$ ) spectrum of entry 9, Table 2.

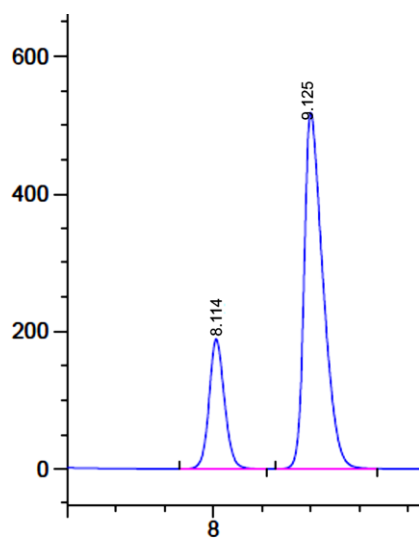

Figure S36. HPLC spectrum of entry 9, Table 2.

DAI-CEL CHRALCEL, IB, n-hexane/i-PrOH 99.5:0.5

| peak | time (min) | area percent |
|------|------------|--------------|
| 1    | 8.114      | 21,743       |
| 2    | 9.125      | 78,257       |

100,000

### References.

- 1) X.-W. Zou, L.-F. Zheng, L.-L. Wu, L.-L. Zong and Y.-X. Cheng, *Chin. J. Chem.*, 2008, **26**, 373-378.
- 2) Z. Halime, S. Balieu, B. Najjari, M. Lachkar, T. Roisnel and B. Boitrel, *J. Porphyrins Phthalocyanines*, 2010, **14**, 412-420.
